# Supplementary material
Source: PubMed Central journal article supplement (PMC3448263)
Supplement: supp_blood-2012-02-412361_blood-2012-02-412361-1.pdf [file supp_blood-2012-02-412361_blood-2012-02-412361-1.pdf]

**Supplemental Data for Meeks et al.**

**A major determinant of the immunogenicity of factor VIII in a murine model is independent of its procoagulant function**

**Materials**

DMEM/F12 (11330-032), fetal bovine serum (FBS), penicillin/streptomycin, and AIM V medium were purchased from Invitrogen (Carlsbad, CA). Alcian Blue was purchased from Sigma-Aldrich (St Louis, MO). Immobilized Protein A, Sulfo-NHS-LC-Biotin, Tween-80 were purchased from Pierce Biotechnology (Rockford, IL). Immulon-1B ELISA plates and high binding half area ELISA plates (Costar) were purchased from Thermo Fisher Scientific (Waltham, MA). Lipofectamine 2000 was purchased from Invitrogen (Carlsbad, CA). Alkaline phosphatase-conjugated streptavidin was purchased from Jackson ImmunoResearch (West Grove, PA). Monoclonal antibody (MAb) ESH-4 was purchased from American Diagnostica (Stamford, CT). Clotting times were measured using a STart coagulation instrument (Diagnostica Stago, Asnieres, France). Activated partial thromboplastin reagent was purchased from Trinity Biotech (Bray, Ireland). Pooled citrated normal human plasma and fVIII-deficient plasma were obtained from George King Biomedical (Overland Park, KS). Reagents for thrombin generation assays including thrombin fluorogenic substrate, TGA SUB (Z-Gly-Gly-Arg-7-amino -4-methylcoumarin, Z-Gly-Gly-Arg-AMC), tissue factor/phospholipid solution, TGA RC low), and thrombin calibrator (TGA CAL) were purchased from DiaPharma (West Chester, OH). Domain-specific murine anti-human fVIII MAbs 2-116 (A1), 1D4 (A2), 2-54 (A2), 2-93 (A2), 4A4 (A2), 2-113 (A3), 5G12 (A3), G38 (A3), 2A9 (C1), I-109 (C2) and I14 (C2) were prepared as described previously<sup>1</sup>. Human VWF was purified from plasma as previously described<sup>2</sup>. All other materials were reagent grade or are described in the cited literature.

**Construction of a cDNA encoding B domain – deleted R372A/R1689A fVIII and V634M fVIII**

The primer sets used to construct V634M fVIII and R372A/R1689A fVIII cDNAs by SOE mutagenesis<sup>3</sup> as well as the restriction sites used for cloning into the mammalian expression vector ReNeo are listed below. The template used for the PCR reactions was wt fVIII with unique *MluI*, *SacII*, *AvrII*, and *BsiWI* sites in the ReNeo vector.

Primers for making R372A fVIII:

Forward primer – 5'-CATGTGGACCTGGTAAAAGACTTGAA -3'

Reverse primer – 5'-CTTGCTTGATTCTTAAATATAATCAA-3'

Internal primers – 5'-CCTTCCTTTATCCAAATTGCCTCAGTTGCCAAGAAGCAT -3

5'-ATGCTTCTTGGCAACTGAGGCAATTTGGATAAAGGAAGG -3'

Restriction enzymes for ligation to ReNeo: *SpeI/MluI*

Primers for adding R1689A to R372A fVIII:

Forward primer – 5'-CATTGGAGCACAGACTGACTTC-3'

Reverse primer – 5'-GCCATTGATTGCATGGAAGCGATA-3'

Internal primers - 5'-GATGAAAATCAGAGCCCCGCCAGCTTTCAAAAGAAAACA-3'

5'-TGTTTTCTTTTCAAAGCTGGCGGGGCTCTGATTTTCATC-3'

Restriction enzymes for ligation to ReNeo: *AvrII/HincII*

Primers for making V634M fVIII:

Forward primer - 5'-TCAGATCCGCGGTGCCTGACCCGCTATTACT-3'

Reverse primer - 5'-AAGAGTCGTACGAGTTATTTCCCGTTG-3'

Internal primers -5'- TCAGTTTGTTTGCATGAGATGGCATACTGGTACATTCTA-3'

5'-TAGAATGTACCAGTATGCCATCTCATGCAAACAAACTGA-3'

Restriction enzymes for ligation to ReNeo: *SacIII/BsiWI*

### **Expression of wt-fVIII, R372A/R1689A fVIII and V634M fVIII from BHK-M cells**

A recombinant B domain-deleted (BDD) human fVIII construct, wt fVIII, was expressed from a baby hamster kidney-derived cell line, designated BHK-M, and purified as described previously<sup>4</sup>. Transfection of BHK-M cells was performed using Lipofectamine 2000 according to the manufacturer's instructions. Transfected cells were diluted onto 10 cm plates and cultured for 10 days in the presence of DMEM/F-12 containing 10% fetal bovine serum, 100 units/ml penicillin, 100 µg/ml streptomycin, and 500 µg/ml geneticin. Geneticin-resistant clones were picked and cultured in 96-well plates with the same media until confluent, and screened for fVIII production using an ELISA assay. Because R372A/R1689A fVIII and V634M fVIII have little or no activity by bioassay, their expression was measured by ELISA using anti-fVIII C2 MAb I14 and biotinylated anti-fVIII A1 domain MAb 2-116 as capture and detection antibodies, respectively, followed by addition of alkaline-phosphatase conjugated streptavidin, and p-nitrophenylphosphate as described previously<sup>1</sup>.

The best expressing clones of R372A/R1689A fVIII and V634M fVIII were grown to near confluence before switching to serum-free AIM-V medium. Media was harvested and purification of recombinant fVIII constructs was performed as described previously for wt BDD fVIII<sup>5</sup>. Concentrations of purified wt fVIII, R372A/R1689A fVIII and V634M fVIII were calculated based on absorbance at 280 nm and an estimated molar extinction coefficient of 256,300 M<sup>-1</sup>cm<sup>-1</sup> based on their tyrosine, tryptophan and cysteine contents<sup>6</sup>. Concentrations were converted to mass units using a molecular weight of 165,300 g/mol based on the polypeptide chain weight. Purified wt fVIII, R372A/R1689A fVIII and V634M fVIII were analyzed by 4-15% gradient SDS-PAGE (3 µg per lane) with and without prior activation by thrombin and stained using Thermo Pierce Gel Code Blue. Molecular weight markers were Bio-Rad Precision Plus Protein Standards. A previously described sandwich ELISA<sup>7</sup> was used to assess the structural integrity of wt fVIII, R372A/R1689A fVIII and V634M fVIII by their ability to bind immobilized domain-

specific murine anti-human fVIII MAbs. Purification tables for wt fVIII, R372A/R1689A fVIII and V634M fVIII preparations are presented in "Supplemental Data". wt fVIII, R372A/R1689A fVIII, and V634M fVIII were diluted into 0.4 M NaCl, 20 mM HEPES, 5 mM CaCl<sub>2</sub>, 0.01% Tween-80 pH 7.4 and stored in small aliquots at -80°C.

**Purification Tables for wt fVIII, R372A/1689A fVIII and V634M fVIII**

|                           | <b>Volume<br/>(mL)</b> | <b>A280</b> | <b>Total<br/>A280</b> | <b>Units/mL</b> | <b>Total<br/>Units</b> | <b>Units/A280</b> | <b>%<br/>Yield</b> | <b>Fold<br/>Purification</b> |
|---------------------------|------------------------|-------------|-----------------------|-----------------|------------------------|-------------------|--------------------|------------------------------|
| <b>wt fVIII</b>           |                        |             |                       |                 |                        |                   |                    |                              |
| AIM-V Medium              | 5000                   | 2.73        | 13700                 | 8               | 41500                  | 3.0               | 100%               | 1                            |
| SP-Sepharose              | 40                     | 0.134       | 5.36                  | 960             | 38400                  | 7170              | 93%                | 2360                         |
| Source Q                  | 8                      | 0.330       | 2.64                  | 2370            | 19000                  | 7190              | 46%                | 2370                         |
| <b>R372A/1689A fVIII</b>  |                        |             |                       |                 |                        |                   |                    |                              |
| AIM-V Medium              | 4000                   | 1.490       | 5960                  | 0.038           | 152                    | 0.026             | 100%               | 1                            |
| SP-Sepharose              | 80                     | 0.043       | 3.44                  | 0.877           | 70                     | 20.3              | 46%                | 795                          |
| Source Q                  | 12.8                   | 0.108       | 1.38                  | 3.05            | 39                     | 28.3              | 26%                | 1110                         |
| <b>V634M fVIII</b>        |                        |             |                       |                 |                        |                   |                    |                              |
| AIM-V Medium              | 4000                   | 2.690       | 10800                 | 0.011           | 44                     | 0.004             | 100%               | 1                            |
| SP-Sepharose and<br>MonoS | 76                     | 0.020       | 1.550                 | 0.307           | 23                     | 15.1              | 53%                | 3700                         |
| Source Q                  | 4                      | 0.170       | 0.678                 | 6.20            | 25                     | 36.6              | 56%                | 8950                         |

**Genotyping FVIII<sup>-/-</sup> and fVIII<sup>-/-</sup>/VWF<sup>-/-</sup> mice**

PCR was performed on mouse DNA obtained by ear punch using primers suggested by the JAX Mice Database Genotyping Protocols.

| <b>k/o</b> | <b>Primer</b> | <b>5' – 3' sequence</b>     | <b>Primer Type</b> |
|------------|---------------|-----------------------------|--------------------|
| fVIII      | oIMR1754      | GAG CAA ATT CCT GTA CTG AC  | Common             |
| fVIII      | oIMR1753      | TGC AAG GCC TGG GCT TAT TT  | Wild type          |
| fVIII      | oIMR1752      | TGT GTC CCG CCC CTT CCT TT  | Mutant             |
| VWF        | oIMR2084      | AGT GAG ACC TTT GGC TTT GC  | Common             |
| VWF        | oIMR3006      | CCC AAC TTT TGC CAA CAA ATA | Wild type          |
| VWF        | oIMR6218      | CCT TCT ATC GCC TTC TTG ACG | Mutant             |

**Clearance of wt fVIII, R372A/R1689A fVIII, and V634M fVIII in fVIII<sup>-/-</sup> mice**

wt fVIII, R372A/R1689A fVIII, and V634M samples were diluted to 1.0 µg in 100 µl of sterile saline and then injected. Blood was collected by terminal cardiac puncture 0.25, 0.5, 1, 2 and 4 h after the final injection, with 3 mice at each time point. Samples were held on ice prior to centrifugation at 3000 x g for 15 minutes at 4°C to collect plasma for analysis by ELISA.

FVIII antigen levels were measured using an ELISA. Corning 96 well 1/2 area high binding ELISA plates were coated with 6 µg/ml MAb 2-116 in Dulbecco's phosphate-buffered saline with 0.05% sodium azide, and were incubated at 4°C overnight. Plates then were blocked for 2 h at room temperature with blocking buffer (20 mM HEPES, 0.15M NaCl, 2 mM CaCl<sub>2</sub>, 0.05% Tween-20, 0.05% sodium azide, 2% (w/v) bovine serum albumin, pH 7.4). In order to create a standard curve of each fVIII construct, constructs were diluted separately to 50 ng/ml in fVIII deficient plasma and incubated for 30 min at 37°C. After incubation, 100 mM of 2-mercaptoethanol (BME) was added to each fVIII construct and incubated for 30 min at room temperature in order to disassociate fVIII from vWF. FVIII constructs then were serially diluted 2-fold in fresh dilution buffer (20 mM HEPES, 0.15M NaCl, 2 mM CaCl<sub>2</sub>, 0.01% Tween-80, 100 mM BME, pH 7.4). The dilutions were transferred to the blocked ELISA plates that had been washed 3 times with wash buffer (20 mM HEPES, 0.15M NaCl, 2 mM CaCl<sub>2</sub>, 0.05% Tween-20, 0.05% sodium azide, pH 7.4).

Mouse plasma samples to be tested were also incubated for 30 minutes at room temperature with 100 mM BME, serially diluted to 1/32, 1/64, 1/128, and 1/256 in dilution buffer, and placed on the blocked ELISA plate with their corresponding fVIII construct standard curve. Plates were incubated for 1 h at room temperature and then washed 3 times with wash buffer. Next, biotinylated 1B5 (1 µg/ml) was diluted 1:500 in blocking buffer and added to the plates as the

detection antibody. After incubation for 1 hour at room temperature, the plates were washed 3 times with wash buffer. Binding was then detected using alkaline-phosphatase conjugated streptavidin and *p*-nitrophenyl-phosphate. FVIII levels for each mouse plasma sample were interpolated off the standard curves.



### **Anti-fVIII IgG ELISA**

ELISA titers plates were coated with 1.5  $\mu\text{g/ml}$  fVIII in 20 mM Bicine, 2 mM  $\text{CaCl}_2$ , pH 9 buffer and blocked with 20 mM HEPES, 0.15M NaCl, 2 mM  $\text{CaCl}_2$ , 0.05% Tween-20, 0.05% Na azide, 2.0% bovine serum albumin, pH 7.4. Murine plasma was serially diluted into blocking buffer starting at a 1/20 dilution. Ab binding was detected with streptavidin-conjugated goat anti-mouse IgG and *p*-nitrophenyl-phosphate. ELISA titration curves of bound biotinylated MAb binding were fitted to the four-parameter logistic equation. The dilution that produced an  $A_{405}$  of 0.3 at 20 minutes was defined as the ELISA titer.

## References

- (1) Healey JF, Parker ET, Barrow RT, Langley TJ, Church WR, Lollar P. The humoral response to human factor VIII in hemophilia A mice. *J Thromb Haemost* 2007;5(3):512-517.
- (2) Lollar P, Hill-Eubanks DC, Parker CG. Association of the factor VIII light chain with von Willebrand factor. *J Biol Chem* 1988;263(21):10451-10455.
- (3) Horton RM, Ho SN, Pullen JK, Hunt HD, Cai Z, Pease LR. Gene splicing by overlap extension. *Methods Enzymol* 1993;217:270-279.
- (4) Doering CB, Parker ET, Healey JF, Craddock HN, Barrow RT, Lollar P. Expression and characterization of recombinant murine factor VIII. *Thromb Haemost* 2002;88(3):450-458.
- (5) Doering CB, Healey JF, Parker ET, Barrow RT, Lollar P. High-level expression of recombinant porcine coagulation factor VIII. *J Biol Chem* 2002;277(41):38345-38349.
- (6) Pace CN, Vajdos F, Fee L, Grimsley G, Gray T. How to measure and predict the molar absorption coefficient of a protein. *Protein Sci* 1995;4(11):2411-2423.
- (7) Summers RJ, Meeks SL, Healey JF et al. Factor VIII A3 domain substitution N1922S results in hemophilia A due to domain-specific misfolding and hyposecretion of functional protein. *Blood* 2011;117(11):3190-3198.
